# Supplementary material for: Glyphosate Excessive Use Affects Citrus Growth and Yield: The Vicious (and Unsustainable) Circle in Brazilian Orchards
Source: MDPI journal article supplement (doi:10.3390/agronomy12020453), 2022-02-11
Supplement: s1 [file s1]

Supplementary Table S1. Weed species identified in the experimental area and its herbicide resistance cases already reported.

| Family / EPPO Code <sup>1</sup> / Scientific name |                                                |  | Resistance Cases<br>(HRAC/WSSA MoA) <sup>b</sup> |   |   |    |    |    |    | Reference |
|---------------------------------------------------|------------------------------------------------|--|--------------------------------------------------|---|---|----|----|----|----|-----------|
| Amaranthaceae                                     |                                                |  |                                                  |   |   |    |    |    |    |           |
| ALRTE                                             | <i>Alternanthera tenella</i>                   |  |                                                  |   |   |    |    |    |    |           |
| AMACH                                             | <i>Amaranthus hybridus</i> var. <i>patulus</i> |  | 2                                                | 4 | 5 | 6  | 9  | 14 |    | [31]      |
| AMADE                                             | <i>Amaranthus deflexus</i>                     |  |                                                  |   |   |    |    |    |    |           |
| AMARE                                             | <i>Amaranthus retroflexus</i>                  |  |                                                  |   |   |    |    |    |    |           |
| AMAVI                                             | <i>Amaranthus viridis</i>                      |  | 2                                                | 5 | 6 | 7  | 14 |    |    | [29, 31]  |
| CHEAL                                             | <i>Chenopodium album</i>                       |  | 2                                                | 4 | 5 | 7  |    |    |    | [31]      |
| Asteraceae                                        |                                                |  |                                                  |   |   |    |    |    |    |           |
| AGECO                                             | <i>Ageratum conyzoides</i>                     |  | 2                                                |   |   |    |    |    |    | [31]      |
| BIDPI                                             | <i>Bidens pilosa</i>                           |  | 2                                                | 5 | 9 | 22 |    |    |    | [31, 45]  |
| EMISO                                             | <i>Emilia fosbergii</i>                        |  |                                                  |   |   |    |    |    |    |           |
| ERICA                                             | <i>Conyza canadensis</i>                       |  | 2                                                | 5 | 7 | 9  | 22 |    |    | [31]      |
| GASCI                                             | <i>Galinsoga quadriradiata</i>                 |  |                                                  |   |   |    |    |    |    |           |
| GASPA                                             | <i>Galinsoga parviflora</i>                    |  |                                                  |   |   |    |    |    |    |           |
| GNASP                                             | <i>Gnaphalium coarctatum</i>                   |  |                                                  |   |   |    |    |    |    |           |
| PTNHY                                             | <i>Parthenium hysterophorus</i>                |  | 2                                                | 9 |   |    |    |    |    |           |
| SONOL                                             | <i>Sonchus oleraceus</i>                       |  | 2                                                | 4 | 9 |    |    |    |    | [31]      |
| TRQPR                                             | <i>Tridax procumbens</i>                       |  | 9                                                |   |   |    |    |    |    | [31]      |
| Brassicaceae                                      |                                                |  |                                                  |   |   |    |    |    |    |           |
| RAPRA                                             | <i>Raphanus raphanistrum</i>                   |  | 2                                                | 4 | 5 | 9  | 12 | 15 | 27 |           |
| Commelinaceae                                     |                                                |  |                                                  |   |   |    |    |    |    |           |
| COMBE                                             | <i>Commelina benghalensis</i>                  |  |                                                  |   |   |    |    |    |    |           |
| Convolvulaceae                                    |                                                |  |                                                  |   |   |    |    |    |    |           |
| IPOQU                                             | <i>Ipomoea quamoclit</i>                       |  |                                                  |   |   |    |    |    |    |           |
| IPOTR                                             | <i>Ipomoea triloba</i>                         |  |                                                  |   |   |    |    |    |    |           |
| PHBPU                                             | <i>Ipomoea purpurea</i>                        |  |                                                  |   |   |    |    |    |    |           |
| Cyperaceae                                        |                                                |  |                                                  |   |   |    |    |    |    |           |
| CYPIR                                             | <i>Cyperus iria</i>                            |  | 2                                                |   |   |    |    |    |    | [31]      |
| Euphorbiaceae                                     |                                                |  |                                                  |   |   |    |    |    |    |           |
| EPHHI                                             | <i>Chamaesyce hirta</i>                        |  |                                                  |   |   |    |    |    |    |           |
| EPHHL                                             | <i>Euphorbia heterophylla</i>                  |  | 2                                                | 7 | 9 | 14 |    |    |    | [31]      |
| Malvaceae                                         |                                                |  |                                                  |   |   |    |    |    |    |           |
| MAVCO                                             | <i>Malvastrum coromandelianum</i>              |  |                                                  |   |   |    |    |    |    |           |
| SIDGZ                                             | <i>Sida glaziovii</i>                          |  |                                                  |   |   |    |    |    |    |           |
| SIDRH                                             | <i>Sida rhombifolia</i>                        |  |                                                  |   |   |    |    |    |    |           |
| SIDSP                                             | <i>Sida spinosa</i>                            |  | 2                                                |   |   |    |    |    |    | [31]      |
| SIDSN                                             | <i>Sida santaremnensis</i>                     |  |                                                  |   |   |    |    |    |    |           |
| Oxalidaceae                                       |                                                |  |                                                  |   |   |    |    |    |    |           |
| OXALA                                             | <i>Oxalis latifolia</i>                        |  |                                                  |   |   |    |    |    |    |           |
| Phyllanthaceae                                    |                                                |  |                                                  |   |   |    |    |    |    |           |
| PYLTE                                             | <i>Phyllanthus tenellus</i>                    |  |                                                  |   |   |    |    |    |    |           |
| Poaceae                                           |                                                |  |                                                  |   |   |    |    |    |    |           |
| BRADC                                             | <i>Urochloa decumbens</i>                      |  |                                                  |   |   |    |    |    |    |           |
| BRARU                                             | <i>Urochloa ruziziensis</i>                    |  |                                                  |   |   |    |    |    |    |           |
| CCHEC                                             | <i>Cenchrus echinatus</i>                      |  |                                                  |   |   |    |    |    |    |           |
| CHRSS <sup>c</sup>                                | <i>Chloris elata</i>                           |  | 9                                                |   |   |    |    |    |    |           |
| DIGHO                                             | <i>Digitaria horizontalis</i>                  |  |                                                  |   |   |    |    |    |    |           |
| DIGIN                                             | <i>Digitaria insularis</i>                     |  | 1                                                | 9 |   |    |    |    |    | [31]      |

|               |                               |    |   |   |   |   |    |    |    |      |
|---------------|-------------------------------|----|---|---|---|---|----|----|----|------|
| ELEIN         | <i>Eleusine indica</i>        | 1  | 2 | 3 | 5 | 9 | 10 | 14 | 22 | [31] |
| PANMA         | <i>Panicum maximum</i>        |    |   |   |   |   |    |    |    |      |
| SETGE         | <i>Setaria parviflora</i>     |    |   |   |   |   |    |    |    |      |
| Portulacaceae |                               |    |   |   |   |   |    |    |    |      |
| POROL         | <i>Portulaca oleracea</i>     | 5  | 7 |   |   |   |    |    |    | [31] |
| Rubiaceae     |                               |    |   |   |   |   |    |    |    |      |
| RCHBR         | <i>Richardia brasiliensis</i> |    |   |   |   |   |    |    |    |      |
| Solanaceae    |                               |    |   |   |   |   |    |    |    |      |
| SOLAM         | <i>Solanum americanum</i>     | 22 |   |   |   |   |    |    |    | [31] |

<sup>a</sup>: Code EPPO: European and Mediterranean Plant Protection Organization (EPPO) (ex-Bayer code);

<sup>b</sup>: Global Classification of Herbicides by Mode of Action by the Herbicide Resistance Action Committee / Weed Science Society of America;

<sup>c</sup>: Code for *Chloris* sp., because *C. elata* does not have EPPO code.
